# Supplementary material for: Rapid and Convenient Single-Chain Variable Fragment-Employed Electrochemical C-Reactive Protein Detection System
Source: MDPI journal article supplement (doi:10.3390/ijms25052859), 2024-03-01
Supplement: s1 [file s1]

## Supplementary information

# Rapid and Convenient Single-Chain Variable Fragment-Employed Electrochemical C-Reactive Protein Detection System

Daimei Miura <sup>1,†</sup>, Saki Motohashi <sup>1,†</sup>, Ayaka Goto <sup>1</sup>, Hayato Kimura <sup>1</sup>, Wakako Tsugawa <sup>1</sup>, Koji Sode <sup>2</sup>,  
Kazunori Ikebukuro <sup>1</sup> and Ryutaro Asano <sup>1,3,\*</sup>

- <sup>1</sup> Department of Biotechnology and Life Science, Graduate School of Engineering, Tokyo University of Agriculture and Technology, 2-24-16 Naka-cho, Koganei 184-8588, Japan; daimei@go.tuat.ac.jp (D.M.); motohashisaki@gmail.com (S.M.); gotoaya@st.go.tuat.ac.jp (A.G.); mich8810eal@gmail.com (H.K.); tsugawa@cc.tuat.ac.jp (W.T.); ikebu@cc.tuat.ac.jp (K.I.)
- <sup>2</sup> Joint Department of Biomedical Engineering, University of North Carolina at Chapel Hill and North Carolina State University, Chapel Hill, NC 27599, USA; ksode@email.unc.edu
- <sup>3</sup> Institute of Global Innovation Research, Tokyo University of Agriculture and Technology, 3-8-1 Harumi-cho, Fuchu 183-8509, Japan
- \* Correspondence: ryutaroa@cc.tuat.ac.jp
- <sup>†</sup> These authors contributed equally to this work.

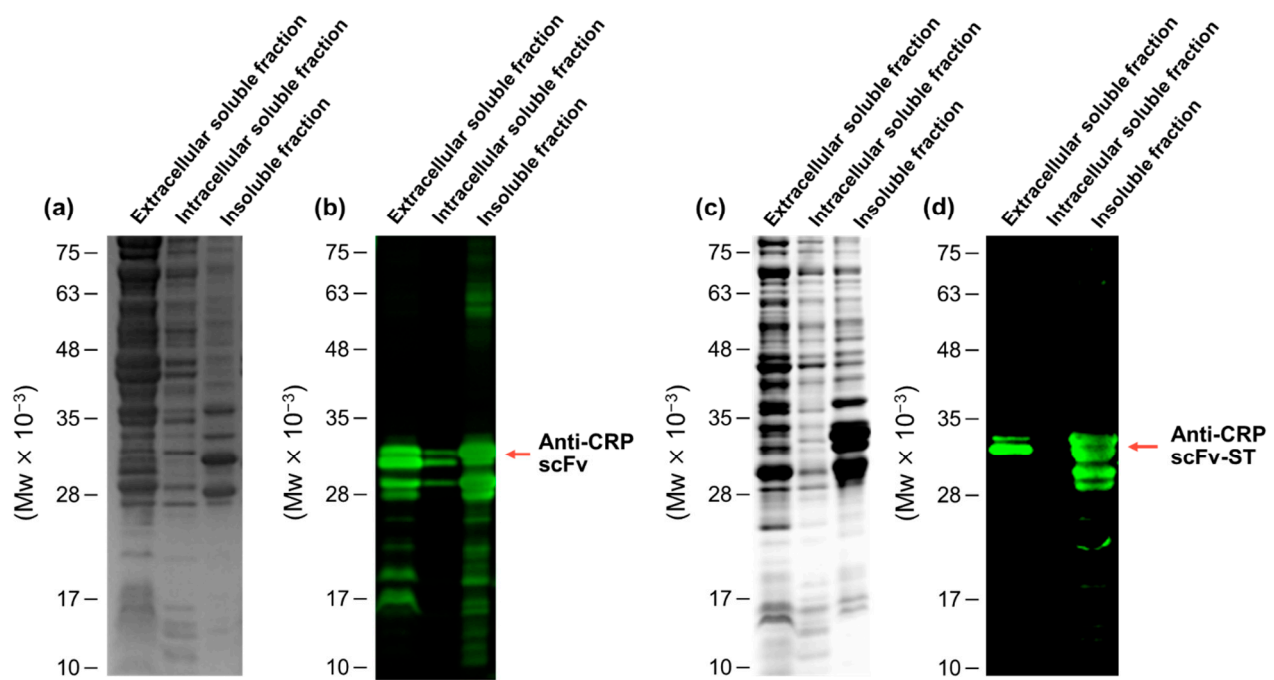

**Figure S1** SDS-PAGE and Western blotting analysis for confirmation of expression of (a, b) anti-CRP scFv and (c, d) anti-CRP scFv-ST).

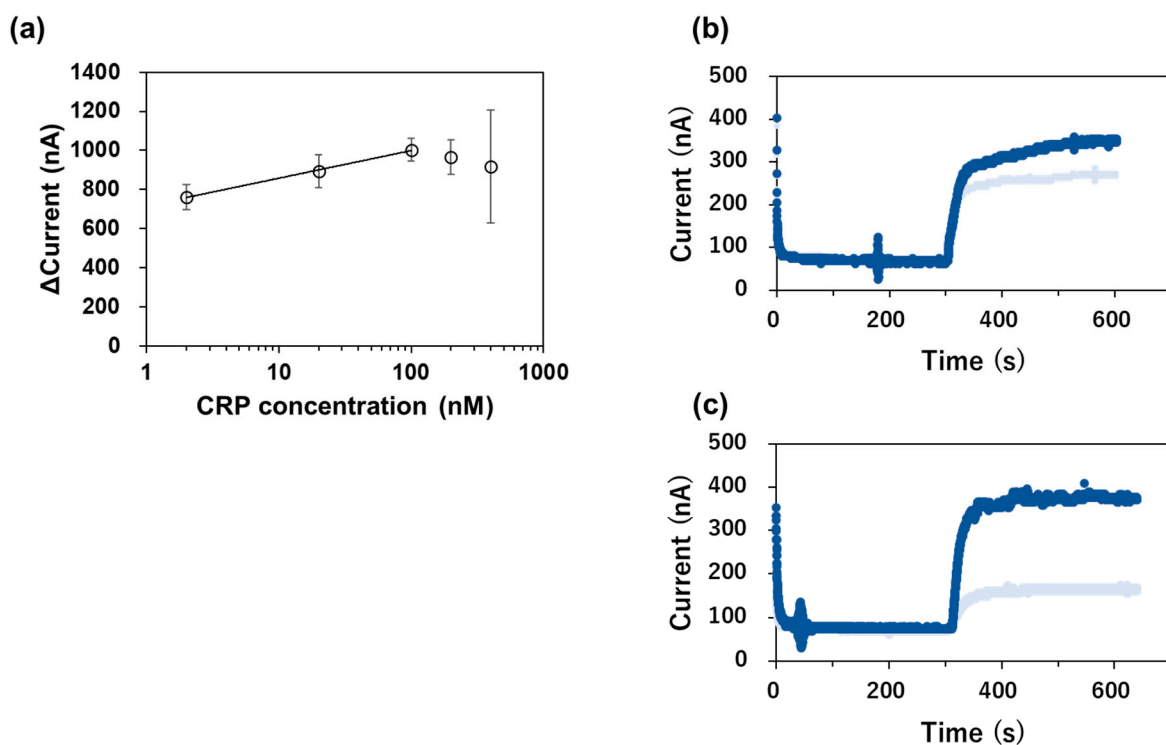

**Figure S2** (a) A calibration curve of the electrochemical detection of CRP detection using our previous protocol ( $n = 3$ ). Electrochemical CRP detection (b) without and (c) with washing after incubation with bivalent AEC, CRP, or scFv-immobilized magnetic beads ( $n = 1$ ).

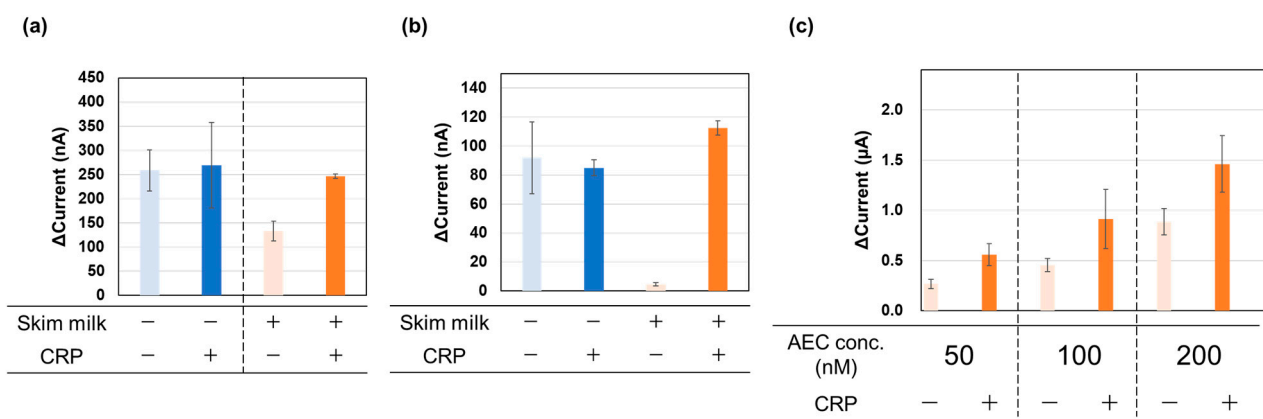

**Figure S3** Investigation of the conditions for electrochemical detection of CRP. (a) The effect of skim milk during the incubation of AEC and CRP with scFv-captured magnetic beads on the prevention of non-specific binding of the bivalent AEC. (b) The effect of a washing procedure and addition of skim milk during the incubation of AEC and CRP with scFv-captured magnetic beads. (c) The effect of the concentration of the bivalent AEC. All data are presented as mean  $\pm$  S.D. ( $n = 3$ ).

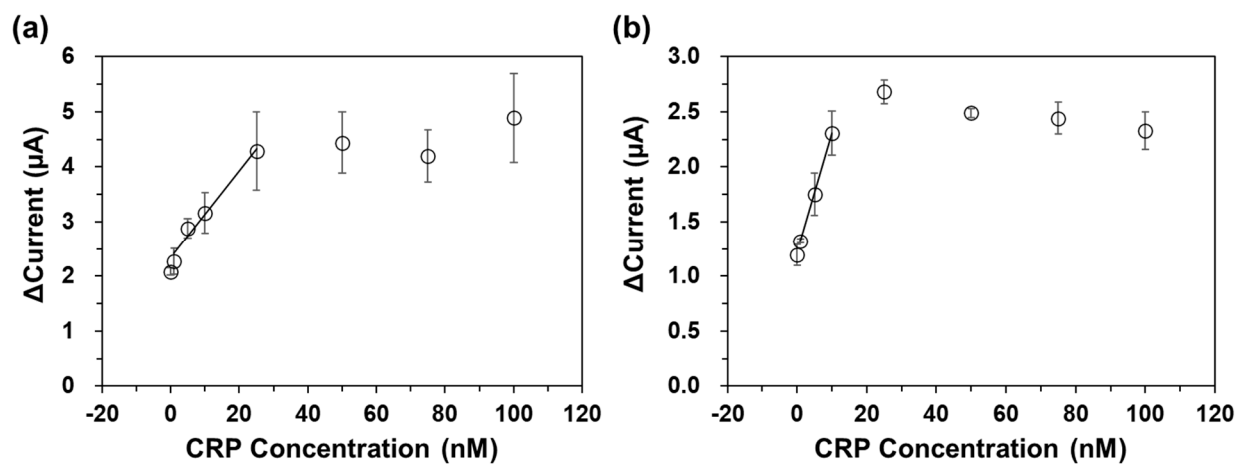

**Figure S4** Calibration curves of detection (a) in buffer and (b) in serum. All data are presented as mean  $\pm$  S.D. ( $n = 3$ ).

**Table S1** Amino acid sequences of the proteins used in this study.

| Protein          | Sequence                                                                                                                                                                                                                                                                                                                                                                                                                                                                                                                                                                                                                                                                                                                                                                                                                                                                                   |
|------------------|--------------------------------------------------------------------------------------------------------------------------------------------------------------------------------------------------------------------------------------------------------------------------------------------------------------------------------------------------------------------------------------------------------------------------------------------------------------------------------------------------------------------------------------------------------------------------------------------------------------------------------------------------------------------------------------------------------------------------------------------------------------------------------------------------------------------------------------------------------------------------------------------|
| Anti-CRP scFv    | MKYLLPTAAAGLLLLAAQPAMAHMASQVQLQQSGAELVKPGASVKLSCTASGFNIDYIMHWVKQRTEQGLEWIGRIDPEDGETKYAPKFQGGKATITADTSS<br>NTAYLQLSSLTSEDATVYYCARGYYGSEAMDYWGQGTSLTVSSGGGGSGGGSGGGSGGGSGTGSIVMTQSHKFMSTSVGDRVSITCKASQDVNTAVAWYQQK<br>PGQSPKLLIYWASTRHTGVPDRFTGSGFGTDYTLTISSVQAEDLALYYCQHYSTPWTFGGGTKLEIKRADAAPKLAAGSAGAHIVMVDAYKPTKAEQKLISEE<br>HH                                                                                                                                                                                                                                                                                                                                                                                                                                                                                                                                                          |
| Anti-CRP scFv-ST | MKYLLPTAAAGLLLLAAQPAMAHMASQVQLQQSGAELVKPGASVKLSCTASGFNIDYIMHWVKQRTEQGLEWIGRIDPEDGETKYAPKFQGGKATITADTSS<br>NTAYLQLSSLTSEDATVYYCARGYYGSEAMDYWGQGTSLTVSSGGGGSGGGSGGGSGGGSGTGSIVMTQSHKFMSTSVGDRVSITCKASQDVNTAVAWYQQK<br>PGQSPKLLIYWASTRHTGVPDRFTGSGFGTDYTLTISSVQAEDLALYYCQHYSTPWTFGGGTKLEIKRADAAPKLAAGSAGAHIVMVDAYKPTKAEQKLISEE<br>DLNLGGGMRGSHHHHHH                                                                                                                                                                                                                                                                                                                                                                                                                                                                                                                                           |
| SC               | MGAMVDTLSGLSSEQQSGDMTIEEDSATHIKFSKRDEDEGKELAGATMELRDSSGKTISTWISDGQVQDFLYPGKYTFVETAAPDGYEVATAITFTVNEQGGQ<br>VTNKGATKGDAHIHHHHHHH                                                                                                                                                                                                                                                                                                                                                                                                                                                                                                                                                                                                                                                                                                                                                            |
| GDH-SC           | MNTTTYDYIVVGGGTSGLVANRLSENPDVSVLLEAGASVFNNPDVTNANGYGLAFGSAIDWQYQSINQSYAGGKQVLRAGKALGGTSTINGMAYTRAED<br>VQIDVWQKLGNEGWTWKDLLPYLKSLENLTAPTSSQVAAGAAYNPACNGKEGPKLVGWSGSLASGNLSVALNRTFQAAGVPWVEDVNCCKMRGFNIYPST<br>LDVDLNVREDAARAYFFPYDDRKNLHLENTTANRLFWKNGSAEEAIDGVEITSADGKVTRVHAKKEVIIISAGALRSPLILELSGVGNPTILKKNITPRVDLPT<br>VGENLQDQFNNGMAGEGYGVLAGASTVTYPSISDVFGNETDSIVASLRSQLSDYAAATVKVSNHGMKQEDLERLYQLQFDLIVKDKVPIAEILFHPGGGNAVS<br>SEFWGLLPFARGNIHISNDPTAPAAINPNYFMFEWDGKSQAGIAKYIRKILRSAPLNKLIJAKETKPGLEIPATAADEKWVEWLKANYRSNHFHPVGTAAAMMPR<br>SIGGVVDNRLRVYGTSNVRVVDASVLPFQVCGHLVSTLYAVAERASDLIKEDAKSAGSGGAMVDTLSGLSSEQQSGDMTIEEDSATHIKFSKRDEDEGKELAG<br>ATMELRDSSGKTISTWISDGQVQDFLYPGKYTFVETAAPDGYEVATAITFTVNEQGGQVTNKGATKGDAHIHHHHHHH                                                                                                                                               |
| SC-GDH-SC        | MGSSHHHHHSSGLVPRGSGAMVDTLSGLSSEQQSGDMTIEEDSATHIKFSKRDEDEGKELAGATMELRDSSGKTISTWISDGQVQDFLYPGKYTFVETA<br>PDGYEVATAITFTVNEQGGQVTNKGATKGDAHIGSGHMNTTTYDYIVVGGGTSGLVANRLSENPDVSVLLEAGASVFNNPDVTNANGYGLAFGSAIDWQY<br>QSINQSYAGGKQVLRAGKALGGTSTINGMAYTRAEDVQIDVWQKLGNEGWTWKDLLPYLKSLENLTAPTSSQVAAGAAYNPACNGKEGPKLVGWSGSLA<br>SGNLSVALNRTFQAAGVPWVEDVNCCKMRGFNIYPSTLDVDLNVREDAARAYFFPYDDRKNLHLENTTANRLFWKNGSAEEAIDGVEITSADGKVTRVHA<br>KKEVIIISAGALRSPLILELSGVGNPTILKKNITPRVDLPTVGENLQDQFNNGMAGEGYGVLAGASTVTYPSISDVFGNETDSIVASLRSQLSDYAAATVKVSN<br>HMKQEDLERLYQLQFDLIVKDKVPIAEILFHPGGGNAVSSEFWGLLPFARGNIHISNDPTAPAAINPNYFMFEWDGKSQAGIAKYIRKILRSAPLNKLIJAKETK<br>GLEIPATAADEKWVEWLKANYRSNHFHPVGTAAAMMPRSIGGVVDNRLRVYGTSNVRVVDASVLPFQVCGHLVSTLYAVAERASDLIKEDAKSAGSGGAMVD<br>TLSGLSSEQQSGDMTIEEDSATHIKFSKRDEDEGKELAGATMELRDSSGKTISTWISDGQVQDFLYPGKYTFVETAAPDGYEVATAITFTVNEQGGQVTNKG<br>ATKGDAHIHHHHHHH |
